# Supplementary material for: Identifying Suitable Supplements to Improve Piglet Survival during Farrowing and Lactation
Source: MDPI journal article supplement (doi:10.3390/ani11102912), 2021-10-08
Supplement: s1 [file s1]

**Table S1:** Summary table of sources discussed in the main paper.

| Source and list number           | Supplement                                  | Dose and Timing                                                                                                                                                                                                    | Trial effects discussed* |              |                      |                   |              |
|----------------------------------|---------------------------------------------|--------------------------------------------------------------------------------------------------------------------------------------------------------------------------------------------------------------------|--------------------------|--------------|----------------------|-------------------|--------------|
|                                  |                                             |                                                                                                                                                                                                                    | Stillbirth               | Birth weight | ADG & weaning weight | Colostrum quality | Milk quality |
| Dearlove et al. 2018 (11)        | Caffeine                                    | Sows fed 6g per day from day 112 of gestation until farrowing                                                                                                                                                      | +                        | /            | /                    | /                 | /            |
| Superchi et al. 2016 (10)        | Caffeine                                    | Sows fed 27mg/kg on day 113 of gestation                                                                                                                                                                           | +                        | /            | /                    | /                 | /            |
| Sánchez-Salcedo et al. 2019 (12) | Caffeine                                    | Sows given 210mg via subcutaneous injection on days 113 and 114 of gestation                                                                                                                                       | +                        | /            | +                    | /                 | /            |
| van Wetters et al. 2018 (13)     | Caffeine and Progesterone                   | Sows fed 5mL of Regumate Porcine daily from days 111 to 113 of gestation, and 2.4g of caffeine per kg diet from day 113 of gestation until parturition                                                             | -                        | /            | /                    | /                 | /            |
| Nuntapaitoon et al 2018 (16)     | L-Arginine HCL                              | Sows fed 0.5% or 1.0% L-Arginine HCL from day 85 of gestation until farrowing                                                                                                                                      | +                        | +            | /                    | +                 | /            |
| Bass et al. 2017 (17)            | L-Arginine                                  | Sows fed 1.0% L-Arginine in late gestation diet                                                                                                                                                                    | /                        | /            | /                    | /                 | /            |
| Hines et al. 2019 (18)           | L-Arginine                                  | Sows fed 1.0% L-Arginine in late gestation diet                                                                                                                                                                    | /                        | /            | /                    | /                 | /            |
| Moreira et al. 2020 (19)         | L-Arginine                                  | Sows fed 1.0% L-Arginine in late gestation diet                                                                                                                                                                    | /                        | +            | /                    | /                 | /            |
| Krogh et al. 2017 (65)           | Crystalline Arginine                        | Sows fed 25g per day of crystalline Arginine from day 30 of gestation until farrowing                                                                                                                              | /                        | /            | /                    | +                 | /            |
| Gaykwad et al. 2019 (23)         | Alpha-tocopherol-selenium and ascorbic acid | Sows administered 1mL/30kg of alpha-tocopherol-selenium via injection on day -15, 2, and 7 relative to farrowing in conjunction with 2g per day per sow of ascorbic acid in feed for the last 15 days of pregnancy | +                        | /            | /                    | /                 | /            |
| Gao et al. 2020 (28)             | Uridine                                     | Sows fed 200g/t of uridine from day 85 of gestation until farrowing                                                                                                                                                | +                        | /            | /                    | /                 | /            |

| Source and list number           | Supplement               | Dose and Timing                                                                                                                                | Trial effects discussed* |              |                      |                   |              |
|----------------------------------|--------------------------|------------------------------------------------------------------------------------------------------------------------------------------------|--------------------------|--------------|----------------------|-------------------|--------------|
|                                  |                          |                                                                                                                                                | Stillbirth               | Birth weight | ADG & weaning weight | Colostrum quality | Milk quality |
| Song et al. 2017 (31)            | Yeast Culture            | Sows fed 4% <i>Saccharomyces cerevisiae</i> re fermented sorghum dried distiller's grains with solubles from day 85 of gestation until weaning | ~                        | /            | +                    | /                 | +            |
| Wu et al. 2012 (39)              | N-Carbamylglutamate      | Sows fed 0.1% N-Carbamylglutamate throughout gestation                                                                                         | /                        | +            | /                    | /                 | /            |
| Zhang et al. 2014 (40)           | N-Carbamylglutamate      | Sows fed 0.05%, 0.10%, or 0.15% N-Carbamylglutamate throughout gestation                                                                       | /                        | +            | /                    | /                 | /            |
| Wijesiriwardana et al. 2019 (41) | 1,3-Butanediol           | Sows fed 4% 1,3-Butanediol in place of wheat in the gestation diet from day 90 of gestation until farrowing                                    | /                        | +            | /                    | /                 | /            |
| Stahly et al. 2014 (43)          | 1,3-Butanediol           | Sows fed 4.55% 1,3-butanediol in the late gestation diet                                                                                       | /                        | /            | /                    | /                 | /            |
| Zhu et al. 2018 (36)             | Glutamine                | Sows fed 1% glutamine from day 85 of gestation until farrowing                                                                                 | /                        | +            | /                    | /                 | /            |
| He et al. 2020 (46)              | Serine                   | Sows fed 25% serine in the late gestation diet                                                                                                 | /                        | +            | +                    | /                 | /            |
| Gourley et al. 2020 (49)         | Lysine                   | Sows and gilts fed increased levels of lysine and energy from day 113 of gestation until farrowing                                             | /                        | ~            | /                    | /                 | /            |
| Jin et al. 2017 (50)             | Soybean Oil              | Sows fed 2.9% soybean oil from day 90 of gestation until farrowing and 3.8% soybean oil throughout farrowing                                   | /                        | /            | +                    | /                 | +            |
| Jin et al. 2017 (50)             | Fish Oil                 | Sows fed 3.0% fish oil from day 90 of gestation until farrowing and 3.9% fish oil throughout farrowing                                         | /                        | /            | +                    | +                 | +            |
| Daneshmand et al. 2017 (51)      | Medium Chain Fatty Acids | Sows fed 7.75g per kg medium-chain fatty acids throughout gestation                                                                            | /                        | /            | /                    | +                 | /            |
| Daneshmand et al. 2017 (51)      | Sodium Butyrate          | Sows fed 1g/kg sodium butyrate throughout gestation                                                                                            | /                        | /            | /                    | +                 | /            |

| Source and list number      | Supplement                        | Dose and Timing                                                                                                                        | Trial effects discussed* |              |                      |                   |              |
|-----------------------------|-----------------------------------|----------------------------------------------------------------------------------------------------------------------------------------|--------------------------|--------------|----------------------|-------------------|--------------|
|                             |                                   |                                                                                                                                        | Stillbirth               | Birth weight | ADG & weaning weight | Colostrum quality | Milk quality |
| Daneshmand et al. 2017 (51) | n-3 polyunsaturated fatty acids   | Sows fed 68.2g per kg n-3 polyunsaturated fatty acids in late gestation and lactation diets                                            | /                        | /            | +                    | +                 | /            |
| Hansen et al. 2018 (52)     | Renin Acid Composition            | Sows fed 5g per day of a composition of 8% resin acid and 90% free fatty acids from one week before expected farrowing until farrowing | /                        | /            | ~                    | ~                 | /            |
| Lan & Kim 2020 (57)         | Enterococcus faecium              | <i>E. faecium</i> added to sow diet from 14 days before farrowing until weaning                                                        | /                        | /            | +                    | /                 | /            |
| Shang et al. 2019 (41)      | Sugar Beet Pulp as a fibre source | Sows fed sugar beet pulp as daily fibre source                                                                                         | /                        | /            | +                    | /                 | /            |
| Agyekum et al. 2019 (59)    | Oat Hay as a fibre source         | Sows fed oat hay as daily fibre source                                                                                                 | /                        | /            | +                    | /                 |              |
| Xi et al. 2017 (66)         | Ginseng Polysaccharides           | Sows fed 400mg per kg of ginseng polysaccharides from day 90 of gestation until weaning                                                | /                        | /            | /                    | +                 | +            |
| Wang et al. 2019 (67)       | Garcinol                          | Sows fed 200 – 600 mg per kg of garcinol from day 90 of gestation until the end of lactation                                           | /                        | /            | /                    | +                 | +            |

\* Trial effects in the presented papers have been highlighted using the following symbols; Positive result: +, Negative result: -, Mixed result: ~, Neutral or not discussed result: /.
